# Supplementary material
Source: PubMed Central journal article supplement (PMC4096218)
Supplement: jm5004649_si_001.pdf [file jm5004649_si_001.pdf]

## Supporting Information

### Undecaprenyl Diphosphate Synthase Inhibitors: Antibacterial Drug Leads

William Sinko<sup>1,2\*</sup>, Yang Wang,<sup>3</sup> Wei Zhu<sup>3</sup>, Yonghui Zhang<sup>3</sup>, Ferran Feixas<sup>2</sup>, Courtney L. Cox<sup>4-5</sup>, Douglas A. Mitchell<sup>3-5</sup>, Eric Oldfield<sup>3</sup>, J. Andrew McCammon<sup>1,2,6</sup>

<sup>1</sup>Pharmacology Department, University of California San Diego, La Jolla, California 92093-0365.

<sup>2</sup>Department of Chemistry & Biochemistry, Department of Pharmacology, and NSF Center for Theoretical Biological Physics, University of California San Diego, La Jolla, California 92093-0365.

<sup>3</sup>Department of Chemistry, University of Illinois, Urbana, IL 61801

<sup>4</sup>Department of Microbiology, University of Illinois, Urbana, IL 61801

<sup>5</sup>Institute for Genomic Biology, University of Illinois, Urbana, IL 61801

<sup>6</sup>Howard Hughes Medical Institute, University of California San Diego, La Jolla, CA 92093-0365.

| TABLE OF CONTENTS                                                           | page |
|-----------------------------------------------------------------------------|------|
| Figure S1. Correlation of pIC <sub>50</sub> with docking scores             | S3,4 |
| Figure S2. <sup>1</sup> H NMR of compound <b>1</b>                          | S5   |
| Figure S3. HPLC analysis of compound <b>1</b>                               | S5   |
| Figure S4. Mass spectrum of the major peak in the HPLC of compound <b>1</b> | S5   |
| Figure S5. High-resolution mass spectrum of compound <b>1</b>               | S6   |
| Figure S6. <sup>1</sup> H NMR of compound <b>4</b>                          | S7   |
| Figure S7. HPLC analysis of compound <b>4</b>                               | S7   |
| Figure S8. Mass spectrum of the major peak in the HPLC of compound <b>4</b> | S7   |
| Figure S9. High-resolution mass spectrum of compound <b>4</b>               | S8   |

Figure S1: Correlation of pIC<sub>50</sub> with docking scores

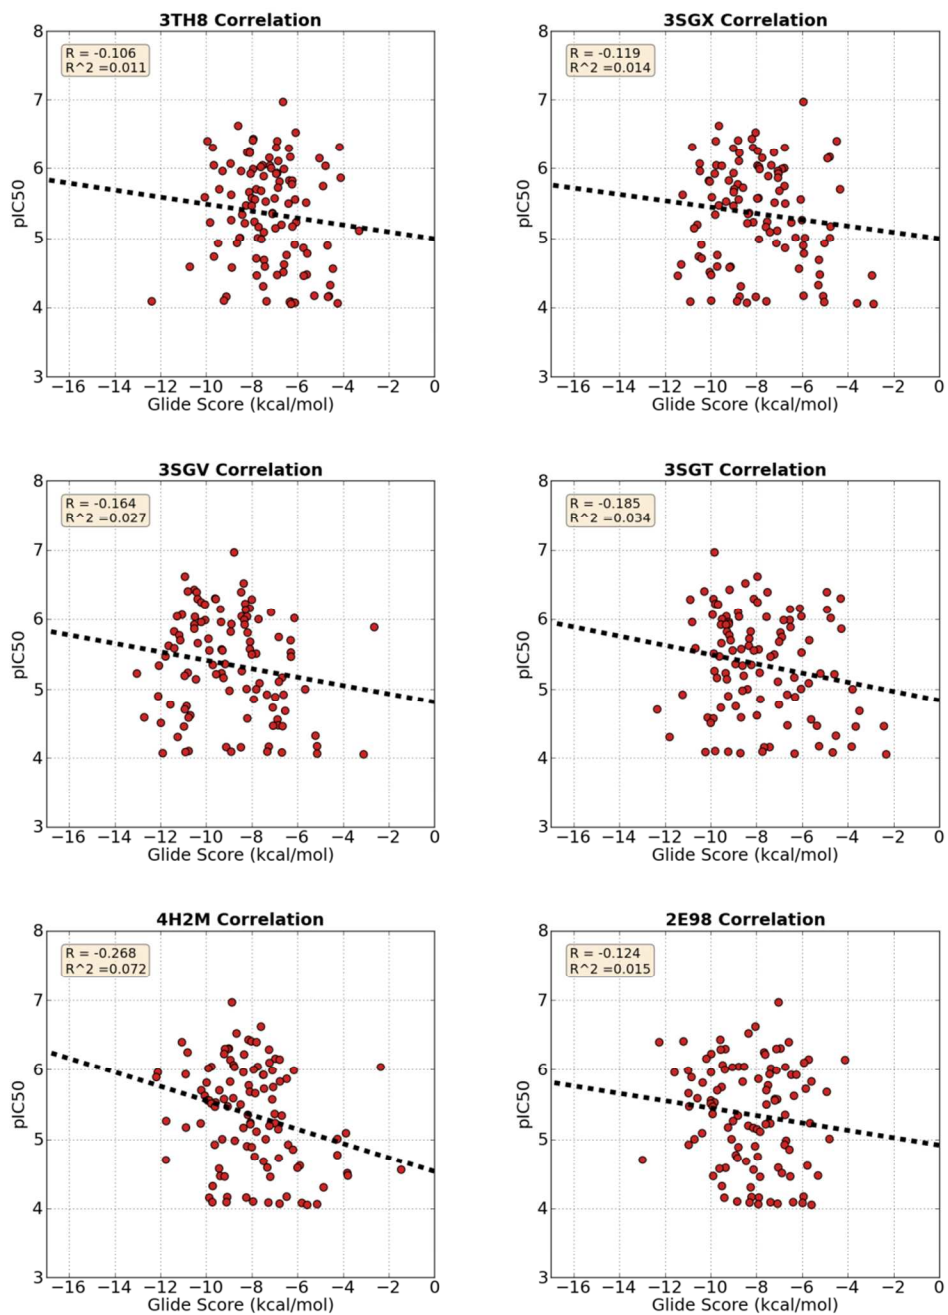

Figure S1(continued): Correlation of pIC<sub>50</sub> with docking scores

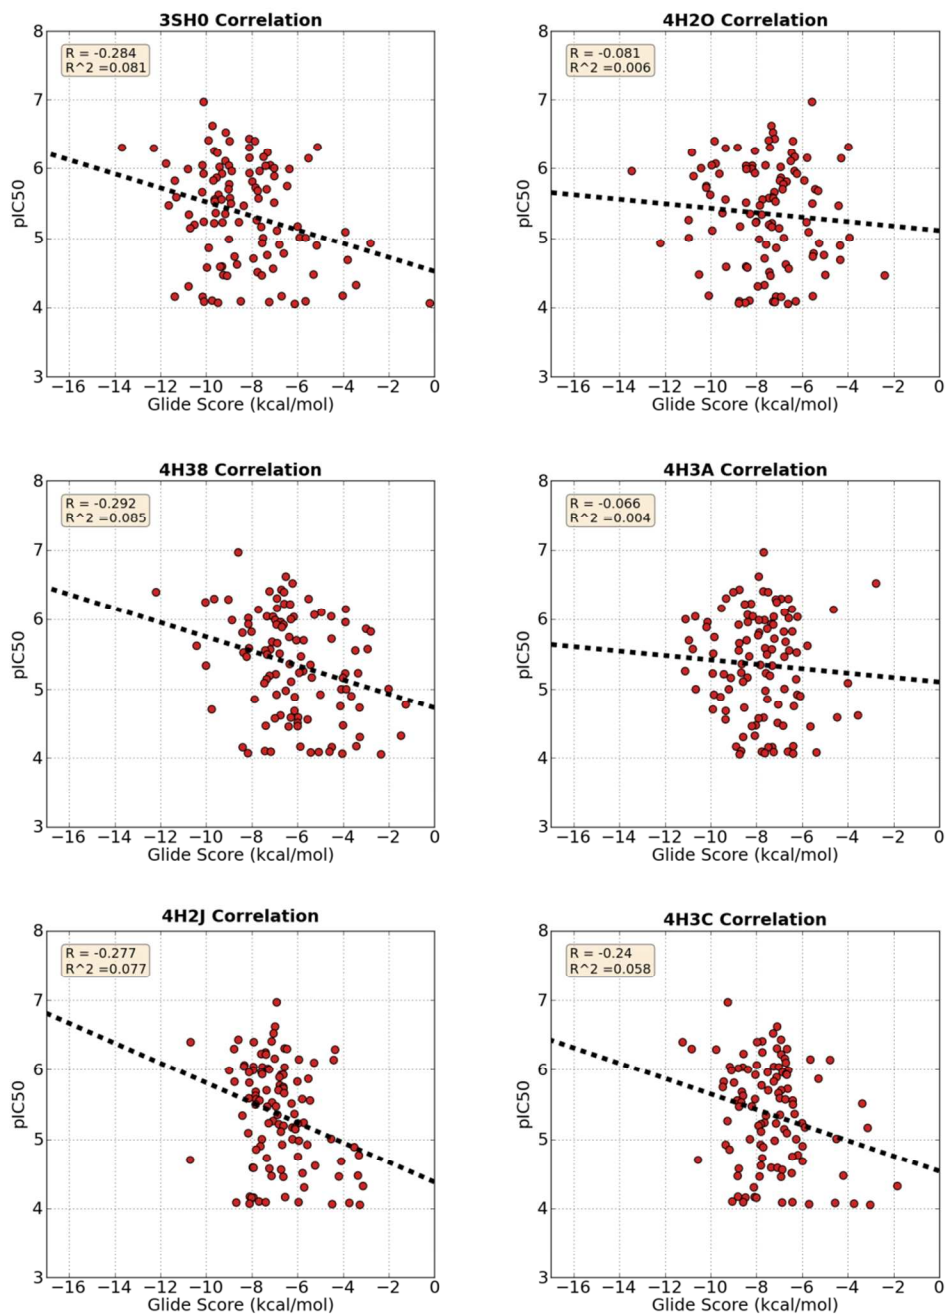



Figure S5. High-resolution mass spectrum of compound 1

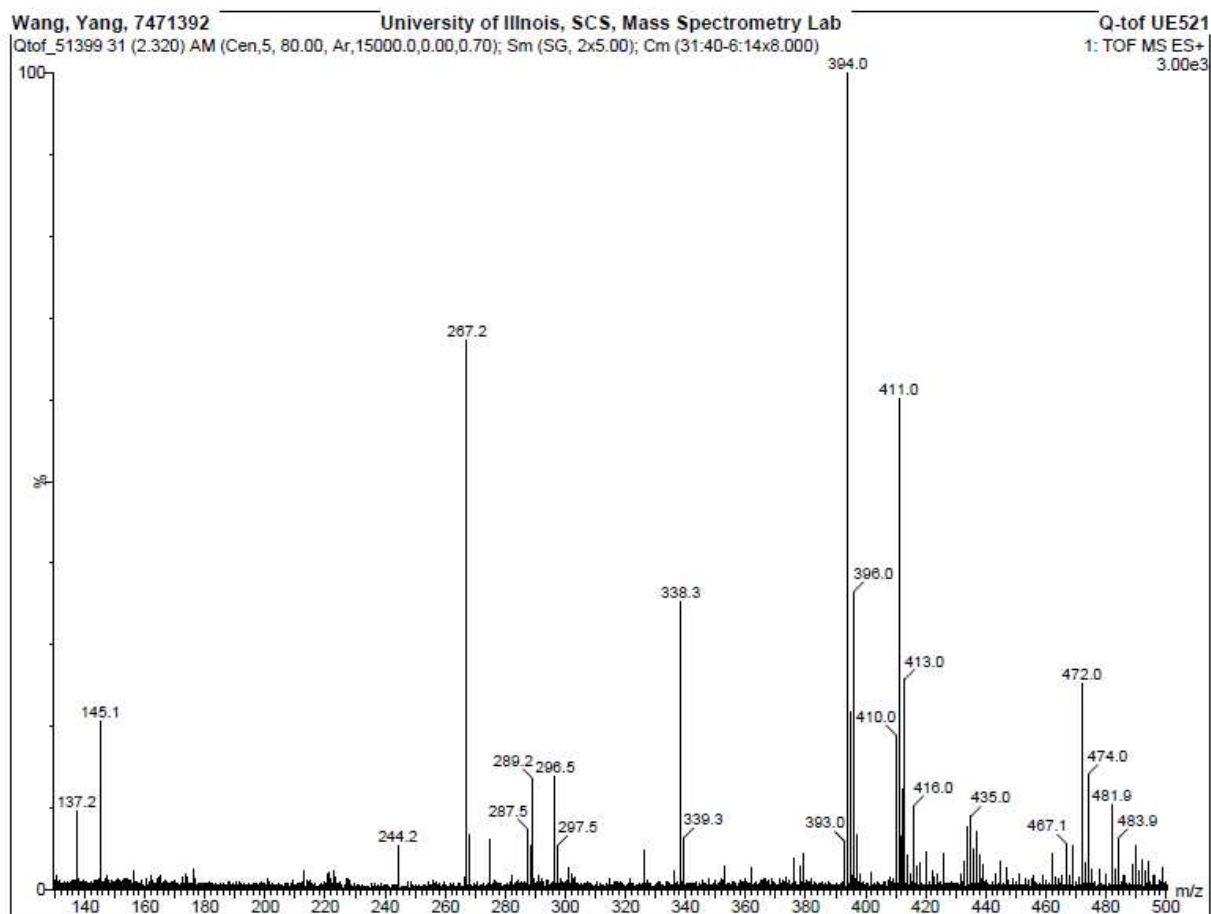

### Elemental Composition Report

#### Single Mass Analysis

Tolerance = 10.0 PPM / DBE: min = -1.5, max = 600.0

Element prediction: Off

Number of isotope peaks used for i-FIT = 3

#### Monoisotopic Mass, Even Electron Ions

23 formula(e) evaluated with 1 results within limits (all results (up to 1000) for each mass)

Elements Used:

C: 0-125 H: 0-250 N: 0-1 O: 3-5 S: 2-2 Cl: 1-1

Wang, Yang, 7471392

University of Illinois, SCS, Mass Spectrometry Lab

Q-tof UE521

Qtof\_51399 32 (2.394) AM (Cen,3, 80.00, Ar,15000.0,716.46,0.70,LS 3); Sm (SG, 2x5.00); Cm (32:35)

1: TOF MS ES+

1.29e+003

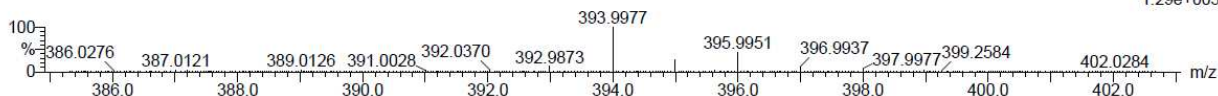

Minimum:

-1.5

Maximum:

5.0

10.0

600.0

| Mass | Calc. Mass | mDa | PPM | DBE | i-FIT | Formula |
|------|------------|-----|-----|-----|-------|---------|
|------|------------|-----|-----|-----|-------|---------|

|          |          |     |     |      |     |                    |
|----------|----------|-----|-----|------|-----|--------------------|
| 393.9977 | 393.9975 | 0.2 | 0.5 | 11.5 | 6.2 | C17 H13 N O4 S2 Cl |
|----------|----------|-----|-----|------|-----|--------------------|

Figure S6. <sup>1</sup>H NMR of compound 4

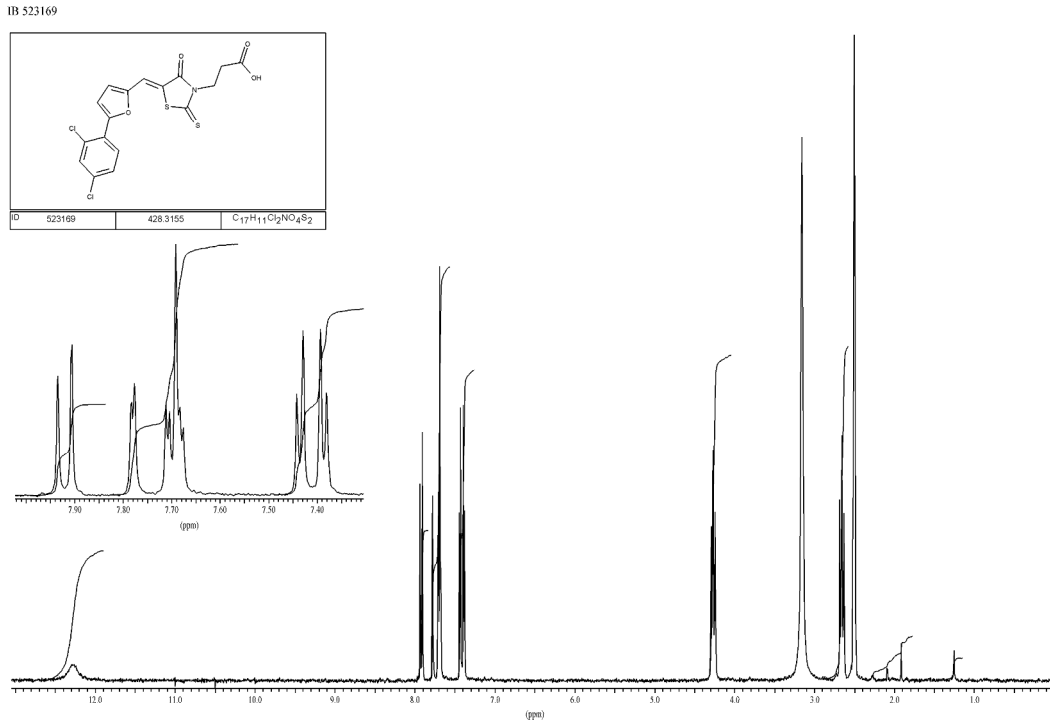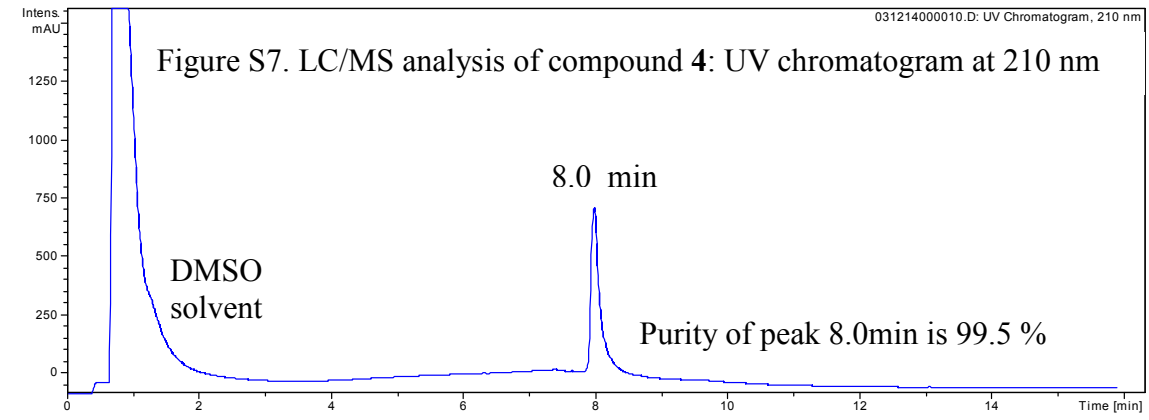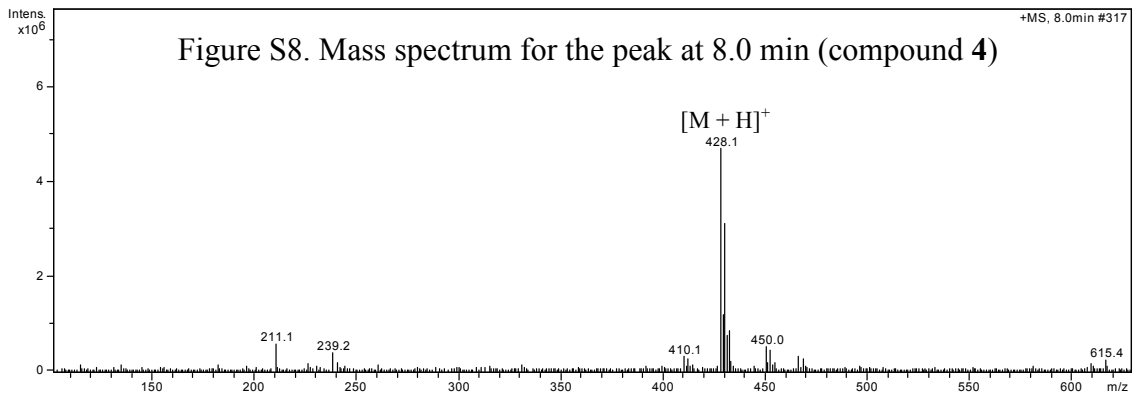

Figure S9. High-resolution mass spectrum of compound 4

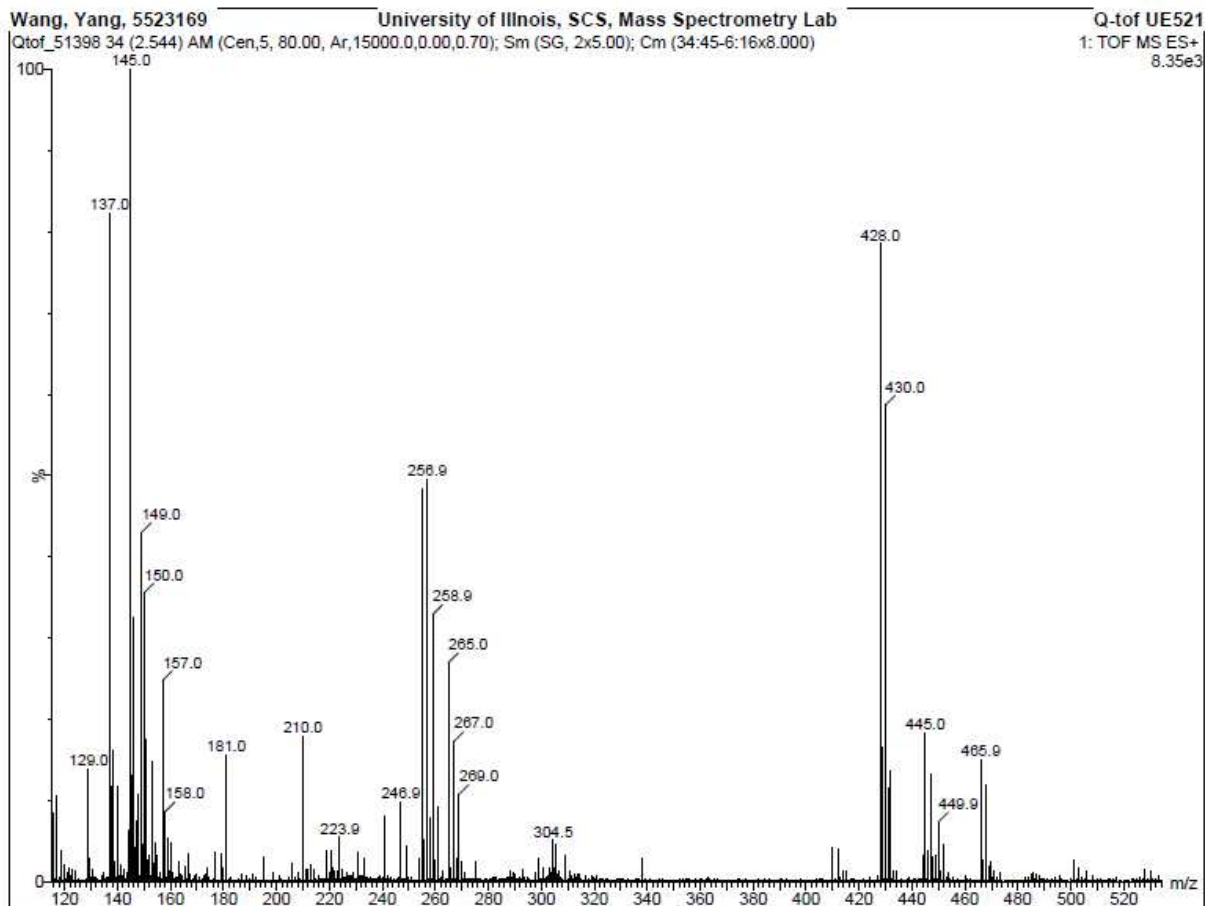

**Elemental Composition Report**

**Single Mass Analysis**

Tolerance = 10.0 PPM / DBE: min = -1.5, max = 600.0

Element prediction: Off

Number of isotope peaks used for i-FIT = 3

Monoisotopic Mass, Even Electron Ions

22 formula(e) evaluated with 1 results within limits (all results (up to 1000) for each mass)

Elements Used:

C: 0-125 H: 0-250 N: 0-1 O: 3-5 S: 2-2 Cl: 2-2

Wang, Yang, 5523169

University of Illinois, SCS, Mass Spectrometry Lab

Q-tof UE521

Qtof\_51398 35 (2.619) AM (Cen,3, 80.00, Ar,15000.0,716.46,0.70,LS 3); Sm (SG, 2x5.00); Cm (35:38)

1: TOF MS ES+

2.31e+003

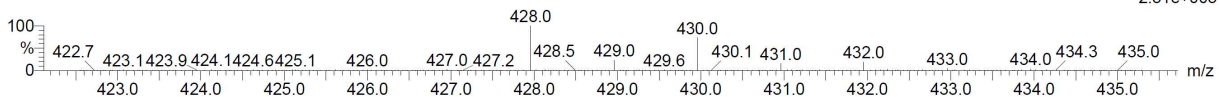

Minimum:

Maximum:

| Mass     | Calc. Mass | mDa | PPM | DBE  | i-FIT | Formula             |
|----------|------------|-----|-----|------|-------|---------------------|
| 427.9586 | 427.9585   | 0.1 | 0.2 | 11.5 | 2.2   | C17 H12 N O4 S2 Cl2 |
